# Supplementary material for: Internet Versus Noninternet Participation in a Decentralized Clinical Trial: Lessons From the ADAPTABLE Study
Source: PubMed Central journal article supplement — J Am Heart Assoc. 2023 Jun 22;12(13):e027899. doi: 10.1161/JAHA.122.027899 (PMC10356087; doi:10.1161/jaha.122.027899), 2023-06-22
Supplement: JAH3-12-e027899-s001.pdf [file JAH3-12-e027899-s001.pdf]

# **SUPPLEMENTAL MATERIAL**

**Table S1. Interaction between internet participation and randomized dose with respect to outcomes (adherence and clinical).**

| Outcome                                                                          | CIF* Estimate at Median Follow-up (26.2 months) |        | Incidence Rate (Events per 100 Patient Years of Follow-up) |              | Unadjusted            |         | Adjusted‡             |         |
|----------------------------------------------------------------------------------|-------------------------------------------------|--------|------------------------------------------------------------|--------------|-----------------------|---------|-----------------------|---------|
|                                                                                  | 81 mg                                           | 325 mg | 81 mg                                                      | 325 mg       | Hazard Ratio (95% CI) | P-value | Hazard Ratio (95% CI) | P-value |
| <b>Medication Adherence</b>                                                      |                                                 |        |                                                            |              |                       | 0.014   |                       | 0.019   |
| <b>Endpoint:</b> dose switching or aspirin discontinuation                       |                                                 |        |                                                            |              |                       |         |                       |         |
| Internet Participant                                                             | 18.58%                                          | 55.42% | 10.79 (1053)                                               | 41.89 (3118) | 0.28 (0.26 - 0.30)    |         | 0.28 (0.26 - 0.30)    |         |
| Non-internet Participant                                                         | 24.96%                                          | 73.08% | 14.33 (193)                                                | 77.89 (595)  | 0.23 (0.19 - 0.27)    |         | 0.23 (0.19 - 0.27)    |         |
| <b>Composite Clinical</b>                                                        |                                                 |        |                                                            |              |                       | 0.150   |                       | 0.108   |
| <b>Endpoint:</b> all-cause death, myocardial infarction, or stroke               |                                                 |        |                                                            |              |                       |         |                       |         |
| Internet Participant                                                             | 6.28%                                           | 6.70%  | 3.09 (439)                                                 | 3.19 (449)   | 0.97 (0.85 - 1.10)    |         | 0.97 (0.85 - 1.11)    |         |
| Non-internet Participant                                                         | 13.73%                                          | 12.96% | 7.29 (151)                                                 | 6.16 (120)   | 1.18 (0.93 - 1.50)    |         | 1.22 (0.96 - 1.55)    |         |
| <b>Safety Endpoint:</b> Major bleeding with associated blood product transfusion |                                                 |        |                                                            |              |                       | 0.477   |                       | 0.440   |
| Internet Participant                                                             | 0.60%                                           | 0.57%  | 0.28 (41)                                                  | 0.26 (37)    | 1.10** (0.70 - 1.71)  |         | 1.11 (0.71 - 1.75)    |         |
| Non-internet Participant                                                         | 0.80%                                           | 0.76%  | 0.56 (12)                                                  | 0.35 (7)     | 1.60† (0.63 - 4.05)   |         | 1.67 (0.66 - 4.23)    |         |

\*CIF: Cumulative Incidence Function

†Sub-distribution hazard ratio (SHR)

‡Models adjusted for age, sex, race, ethnicity and invitation method.

**Table S2. Baseline characteristics and trial details of participants by internet participation at randomization and last observed visit.**

| Characteristic                      | Overall<br>(N=15,076) | Internet Participation at<br>Randomization           |                                                         | Non-Internet Participation at<br>Randomization   |                                                         |
|-------------------------------------|-----------------------|------------------------------------------------------|---------------------------------------------------------|--------------------------------------------------|---------------------------------------------------------|
|                                     |                       | Internet<br>Participant- Last<br>Visit<br>(N=11,474) | Non-internet<br>Participant- Last<br>Visit<br>(N=1,698) | Internet<br>Participant- Last<br>Visit<br>(N=13) | Non-internet<br>Participant- Last<br>Visit<br>(N=1,891) |
| Age (yrs): median (IQR)             | 68 (61 - 74)          | 67 (60 - 73)                                         | 68 (61 - 74)                                            | 62 (56 - 67)                                     | 69 (63 - 76)                                            |
| Female                              | 4724 (31.3%)          | 3428 (29.9%)                                         | 556 (32.7%)                                             | 5 (38.5%)                                        | 735 (38.9%)                                             |
| Race                                |                       |                                                      |                                                         |                                                  |                                                         |
| White                               | 11990 (79.5%)         | 9695 (84.5%)                                         | 1250 (73.6%)                                            | 9 (69.2%)                                        | 1036 (54.8%)                                            |
| Black or African<br>American        | 1311 (8.7%)           | 600 (5.2%)                                           | 191 (11.2%)                                             | 3 (23.1%)                                        | 517 (27.3%)                                             |
| Asian                               | 146 (1.0%)            | 107 (0.9%)                                           | 13 (0.8%)                                               | 0 (0.0%)                                         | 26 (1.4%)                                               |
| American Indian or<br>Alaska native | 114 (0.8%)            | 74 (0.6%)                                            | 14 (0.8%)                                               | 0 (0.0%)                                         | 26 (1.4%)                                               |
| Multiple                            | 134 (0.9%)            | 101 (0.9%)                                           | 15 (0.9%)                                               | 1 (7.7%)                                         | 17 (0.9%)                                               |
| Other                               | 401 (2.7%)            | 168 (1.5%)                                           | 34 (2.0%)                                               | 0 (0.0%)                                         | 199 (10.5%)                                             |
| Not reported                        | 980 (6.5%)            | 729 (6.4%)                                           | 181 (10.7%)                                             | 0 (0.0%)                                         | 70 (3.7%)                                               |
| Hispanic                            | 481 (3.2%)            | 224 (2.0%)                                           | 45 (2.7%)                                               | 0 (0.0%)                                         | 212 (11.2%)                                             |
| Smoking Status                      |                       |                                                      |                                                         |                                                  |                                                         |
| Current                             | 1382 (9.8%)           | 870 (8.2%)                                           | 223 (13.4%)                                             | 3 (23.1%)                                        | 286 (15.2%)                                             |
| Body Mass Index:<br>median (IQR)    | 30 (27 - 34)          | 30 (27 - 34)                                         | 30 (27 - 35)                                            | 32 (29 - 36)                                     | 30 (26 - 34)                                            |
| <b>Trial Details</b>                |                       |                                                      |                                                         |                                                  |                                                         |
| Randomized Dose                     |                       |                                                      |                                                         |                                                  |                                                         |
| 81 mg                               | 7540 (50.0%)          | 5720 (49.9%)                                         | 840 (49.5%)                                             | 5 (38.5%)                                        | 975 (51.6%)                                             |

|                                               |               |              |              |            |              |
|-----------------------------------------------|---------------|--------------|--------------|------------|--------------|
| 325 mg                                        | 7536 (50.0%)  | 5754 (50.1%) | 858 (50.5%)  | 8 (61.5%)  | 916 (48.4%)  |
| <b>Randomized Follow-up Interval</b>          |               |              |              |            |              |
| 3 Months                                      | 7541 (50.0%)  | 5775 (50.3%) | 829 (48.8%)  | 7 (53.8%)  | 930 (49.2%)  |
| 6 Months                                      | 7535 (50.0%)  | 5699 (49.7%) | 869 (51.2%)  | 6 (46.2%)  | 961 (50.8%)  |
| <b>Invitation Method</b>                      |               |              |              |            |              |
| Received an Email                             | 5900 (39.1%)  | 5344 (46.6%) | 503 (29.6%)  | 2 (15.4%)  | 51 (2.7%)    |
| Received a Letter                             | 3400 (22.6%)  | 2741 (23.9%) | 352 (20.7%)  | 1 (7.7%)   | 306 (16.2%)  |
| Approached face-to-face in a clinical setting | 4080 (27.1%)  | 2113 (18.4%) | 574 (33.8%)  | 9 (69.2%)  | 1384 (73.2%) |
| Contacted by Telephone                        | 1695 (11.2%)  | 1275 (11.1%) | 269 (15.8%)  | 1 (7.7%)   | 150 (7.9%)   |
| <b>Medical History</b>                        |               |              |              |            |              |
| Prior Myocardial Infarction                   | 5305 (36.2%)  | 3768 (33.9%) | 648 (39.0%)  | 8 (61.5%)  | 881 (46.7%)  |
| Prior CABG*                                   | 3527 (24.1%)  | 2548 (23.0%) | 432 (26.0%)  | 2 (15.4%)  | 545 (28.9%)  |
| Prior PCI†                                    | 5946 (40.6%)  | 4257 (38.3%) | 733 (44.2%)  | 7 (53.8%)  | 949 (50.3%)  |
| Cerebrovascular Disease                       | 2624 (17.9%)  | 1829 (16.5%) | 321 (19.3%)  | 4 (30.8%)  | 470 (24.9%)  |
| Hypertension                                  | 12512 (85.3%) | 9303 (83.8%) | 1448 (87.2%) | 12 (92.3%) | 1749 (92.7%) |
| Hyperlipidemia                                | 12946 (88.3%) | 9748 (87.8%) | 1493 (89.9%) | 11 (84.6%) | 1694 (89.8%) |
| Atrial Fibrillation                           | 1233 (8.4%)   | 924 (8.3%)   | 147 (8.9%)   | 0 (0.0%)   | 162 (8.6%)   |
| Congestive Heart Failure                      | 3504 (23.9%)  | 2345 (21.1%) | 460 (27.7%)  | 4 (30.8%)  | 695 (36.8%)  |
| Peripheral Artery Disease                     | 3493 (23.8%)  | 2321 (20.9%) | 444 (26.7%)  | 1 (7.7%)   | 727 (38.5%)  |
| Diabetes Mellitus                             | 5676 (38.7%)  | 3977 (35.8%) | 720 (43.4%)  | 5 (38.5%)  | 974 (51.6%)  |
| History of Bleeding                           | 1267 (8.6%)   | 862 (7.8%)   | 170 (10.2%)  | 2 (15.4%)  | 233 (12.3%)  |
| Significant Gastrointestinal Bleed            | 950 (6.5%)    | 640 (5.8%)   | 123 (7.4%)   | 2 (15.4%)  | 185 (9.8%)   |
| Intracranial Hemorrhage                       | 208 (1.4%)    | 142 (1.3%)   | 28 (1.7%)    | 0 (0.0%)   | 38 (2.0%)    |
| <b>Prior Medications</b>                      |               |              |              |            |              |

|                                                        |               |               |              |               |               |
|--------------------------------------------------------|---------------|---------------|--------------|---------------|---------------|
| Prior Aspirin Use                                      | 13537 (96.0%) | 10098 (95.7%) | 1578 (95.1%) | 11 (84.6%)    | 1850 (98.6%)  |
| Prior Dose                                             |               |               |              |               |               |
| 81 mg                                                  | 11547 (85.4%) | 8580 (85.1%)  | 1343 (85.5%) | 11 (100.0%)   | 1613 (87.3%)  |
| 162 mg                                                 | 310 (2.3%)    | 256 (2.5%)    | 28 (1.8%)    | 0 (0.0%)      | 26 (1.4%)     |
| 325 mg                                                 | 1657 (12.3%)  | 1249 (12.4%)  | 200 (12.7%)  | 0 (0.0%)      | 208 (11.3%)   |
| P2Y12 Inhibitor                                        | 3051 (22.1%)  | 2187 (21.0%)  | 386 (25.2%)  | 1 (8.3%)      | 477 (25.5%)   |
| <b>Trial Adherence</b>                                 |               |               |              |               |               |
| Percentage of Visits Completed: median (IQR)           | 88 (67 - 100) | 93 (67 - 100) | 75 (60 - 86) | 89 (83 - 100) | 89 (73 - 100) |
| Categories of Visit Completion                         |               |               |              |               |               |
| 0%                                                     | 775 (5.1%)    | 763 (6.7%)    | 2 (0.1%)     | 0 (0.0%)      | 10 (0.5%)     |
| 1-25%                                                  | 659 (4.4%)    | 506 (4.4%)    | 39 (2.3%)    | 1 (7.7%)      | 113 (6.0%)    |
| 26-50%                                                 | 1428 (9.5%)   | 1011 (8.8%)   | 241 (14.2%)  | 0 (0.0%)      | 176 (9.3%)    |
| 51-75%                                                 | 2589 (17.2%)  | 1646 (14.3%)  | 659 (38.8%)  | 0 (0.0%)      | 284 (15.0%)   |
| 76-99%                                                 | 2779 (18.4%)  | 1838 (16.0%)  | 412 (24.3%)  | 7 (53.8%)     | 522 (27.6%)   |
| 100%                                                   | 6842 (45.4%)  | 5707 (49.8%)  | 345 (20.3%)  | 5 (38.5%)     | 785 (41.5%)   |
| Number of Visits Completed with Call Center Assistance | 2 (1 - 3)     | 1 (1 - 2)     | 3 (2 - 4)    | 3 (2 - 3)     | 4 (2 - 6)     |

\*CABG: coronary artery bypass graft

†PCI: percutaneous intervention

**Figure S1. Safety Endpoint: Major Bleeding Requiring Hospitalization.**

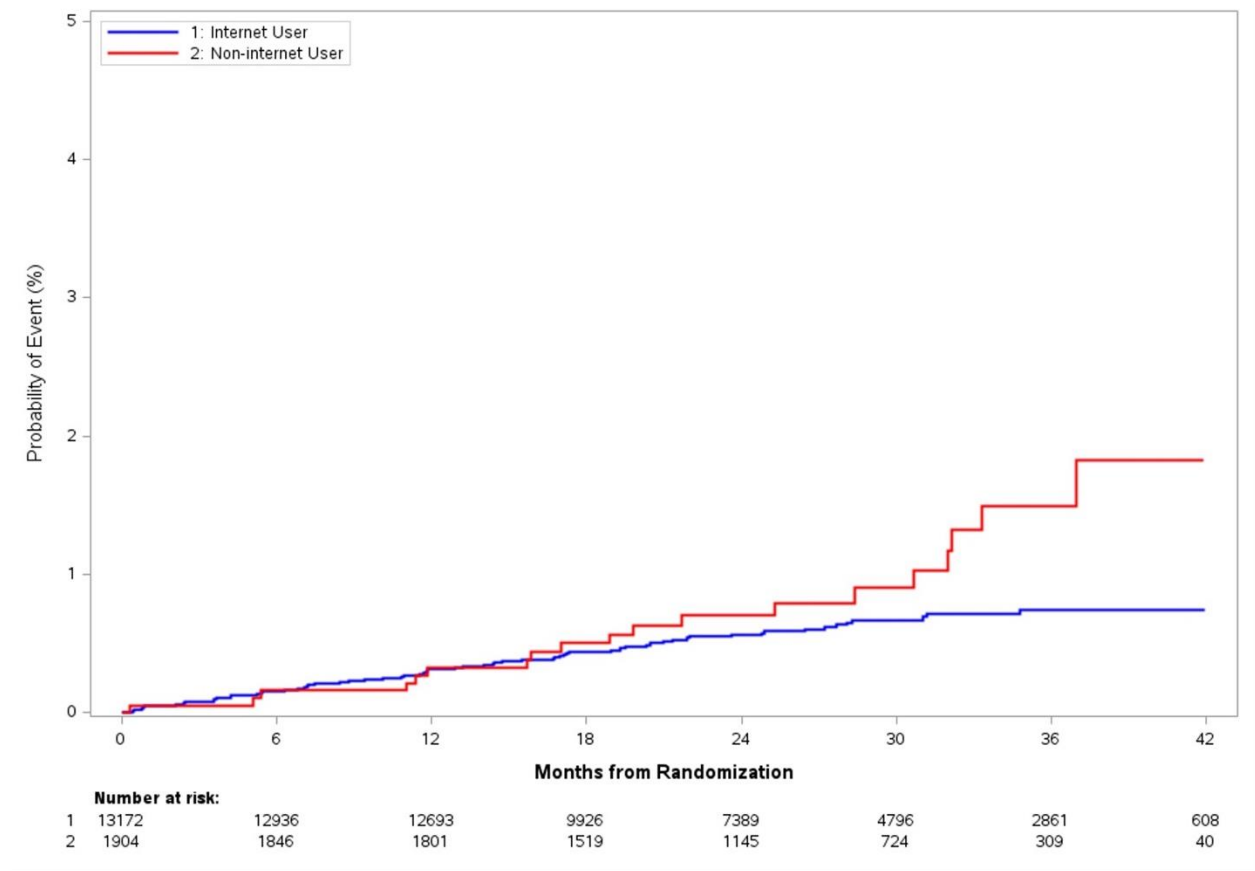

Cumulative incidence function (CIF) curve for major bleeding by internet participation at randomization. At the median time of follow-up in the study, non-internet participants had more major bleeding events, widening the gap until the end of the study.
